# Supplementary material for: Examination of Adverse Reactions After COVID-19 Vaccination Among Patients With a History of Multisystem Inflammatory Syndrome in Children
Source: PubMed Central journal article supplement (PMC9857632; doi:10.1001/jamanetworkopen.2022.48987), 2023-01-03
Supplement: jamanetwopen-e2248987-s002.pdf [file jamanetwopen-e2248987-s002.pdf]

| <b>*Group Name(s): Pediatric Heart Network MUSIC Study Investigators</b> |                   |                              |                         |                                                 |                                                 |                                                                |                                                                                                   |
|--------------------------------------------------------------------------|-------------------|------------------------------|-------------------------|-------------------------------------------------|-------------------------------------------------|----------------------------------------------------------------|---------------------------------------------------------------------------------------------------|
| <b>*First Name and Middle Initial(s)</b>                                 | <b>*Last Name</b> | <b>*Suffix (eg, Jr, III)</b> | <b>Academic Degrees</b> | <b>Institution</b>                              | <b>Location (city, state/province, country)</b> | <b>Role or Contribution, eg, chair, principal investigator</b> | <b>Group (if more than 1 Group listed in the byline) and/or Subgroup (eg, Steering Committee)</b> |
| Gail                                                                     | Pearson           |                              |                         | National Heart, Lung, and Blood Institute       | Bethesda, MD                                    |                                                                |                                                                                                   |
| Victoria                                                                 | Pemberton         |                              |                         | National Heart, Lung, and Blood Institute       | Bethesda, MD                                    |                                                                |                                                                                                   |
| D'Andrea                                                                 | Egerson           |                              |                         | National Heart, Lung, and Blood Institute       | Bethesda, MD                                    |                                                                |                                                                                                   |
| Lynn                                                                     | Mahony            |                              |                         | University of Texas Southwestern Medical Center | Dallas, TX                                      | Protocol Chair                                                 |                                                                                                   |
| Julie                                                                    | Miller            |                              |                         | Data Coordinating Center                        | Newton, MA                                      | Primary investigator                                           |                                                                                                   |
| Kerri                                                                    | Hayes             |                              |                         | Data Coordinating Center                        | Newton, MA                                      |                                                                |                                                                                                   |
| Allison                                                                  | Crosby-Thompson   |                              |                         | Data Coordinating Center                        | Newton, MA                                      |                                                                |                                                                                                   |
| Ayesha                                                                   | Amarnath          |                              |                         | Data Coordinating Center                        | Newton, MA                                      |                                                                |                                                                                                   |
| James                                                                    | Ambrosoli         |                              |                         | Data Coordinating Center                        | Newton, MA                                      |                                                                |                                                                                                   |
| Cassandra                                                                | Artis             |                              |                         | Data Coordinating Center                        | Newton, MA                                      |                                                                |                                                                                                   |
| Kay                                                                      | Rubio             |                              |                         | Data Coordinating Center                        | Newton, MA                                      |                                                                |                                                                                                   |
| Chitra                                                                   | Kinhikar          |                              |                         | Data Coordinating Center                        | Newton, MA                                      |                                                                |                                                                                                   |
| Amanda                                                                   | Marshall          |                              |                         | Data Coordinating Center                        | Newton, MA                                      |                                                                |                                                                                                   |
| Devine                                                                   | Mbiydzenyuy       |                              |                         | Data Coordinating Center                        | Newton, MA                                      |                                                                |                                                                                                   |
| Valentina                                                                | Kazlova           |                              |                         | Data Coordinating Center                        | Newton, MA                                      |                                                                |                                                                                                   |
| Chenwei                                                                  | Hu                |                              |                         | Data Coordinating Center                        | Newton, MA                                      |                                                                |                                                                                                   |
| Lozan                                                                    | Eyob              |                              |                         | Data Coordinating Center                        | Newton, MA                                      |                                                                |                                                                                                   |
| Beverly                                                                  | Slayton           |                              |                         | Data Coordinating Center                        | Newton, MA                                      |                                                                |                                                                                                   |
| Lauren                                                                   | DiStefano         |                              |                         | Data Coordinating Center                        | Newton, MA                                      |                                                                |                                                                                                   |
| Jami                                                                     | Honig             |                              |                         | Data Coordinating Center                        | Newton, MA                                      |                                                                |                                                                                                   |
| Tiffany                                                                  | Bowie             |                              |                         | Data Coordinating Center                        | Newton, MA                                      |                                                                |                                                                                                   |
| Rob                                                                      | Nero              |                              |                         | Data Coordinating Center                        | Newton, MA                                      |                                                                |                                                                                                   |
| Emily                                                                    | Birmingham        |                              |                         | Data Coordinating Center                        | Newton, MA                                      |                                                                |                                                                                                   |
| Robin                                                                    | Rowe              |                              |                         | Data Coordinating Center                        | Newton, MA                                      |                                                                |                                                                                                   |
| Melissa                                                                  | Joyce             |                              |                         | Data Coordinating Center                        | Newton, MA                                      |                                                                |                                                                                                   |
| Cole                                                                     | Gallagher         |                              |                         | Data Coordinating Center                        | Newton, MA                                      |                                                                |                                                                                                   |
| Djenawa                                                                  | Bowman            |                              |                         | Data Coordinating Center                        | Newton, MA                                      |                                                                |                                                                                                   |
| Mo                                                                       | Zhang             |                              |                         | Data Coordinating Center                        | Newton, MA                                      |                                                                |                                                                                                   |
| Alissa                                                                   | Mooney            |                              |                         | Data Coordinating Center                        | Newton, MA                                      |                                                                |                                                                                                   |
| Andreea                                                                  | Dragulescu        |                              |                         | Hospital for Sick Children                      | Toronto, Ontario, Canada                        | Co-investigator                                                |                                                                                                   |
| Christopher                                                              | Lam               |                              |                         | Hospital for Sick Children                      | Toronto, Ontario, Canada                        | Co-investigator                                                |                                                                                                   |
| Rae                                                                      | Yeung             |                              |                         | Hospital for Sick Children                      | Toronto, Ontario, Canada                        | Co-investigator                                                |                                                                                                   |
| Beth                                                                     | Gamulka           |                              |                         | Hospital for Sick Children                      | Toronto, Ontario, Canada                        | Co-investigator                                                |                                                                                                   |
| Jessica                                                                  | Bainton           |                              |                         | Hospital for Sick Children                      | Toronto, Ontario, Canada                        |                                                                |                                                                                                   |
| Martha                                                                   | Rolland           |                              |                         | Hospital for Sick Children                      | Toronto, Ontario, Canada                        |                                                                |                                                                                                   |
| Patti                                                                    | Walter            |                              |                         | Hospital for Sick Children                      | Toronto, Ontario, Canada                        |                                                                |                                                                                                   |
| Simran                                                                   | Mahanta           |                              |                         | Boston Children's Hospital                      | Boston, MA                                      |                                                                |                                                                                                   |
| Thomas                                                                   | Giorgio           |                              |                         | Boston Children's Hospital                      | Boston, MA                                      |                                                                |                                                                                                   |
| Numaira                                                                  | Khan              |                              |                         | Boston Children's Hospital                      | Boston, MA                                      |                                                                |                                                                                                   |
| Annette                                                                  | Baker             |                              |                         | Boston Children's Hospital                      | Boston, MA                                      |                                                                |                                                                                                   |
| Lisa Jean                                                                | Buckley           |                              |                         | Boston Children's Hospital                      | Boston, MA                                      |                                                                |                                                                                                   |
| Jessica                                                                  | Jones             |                              |                         | Boston Children's Hospital                      | Boston, MA                                      |                                                                |                                                                                                   |
| LaTina                                                                   | Watson            |                              |                         | Boston Children's Hospital                      | Boston, MA                                      |                                                                |                                                                                                   |
| Anna                                                                     | Clarke            |                              |                         | Boston Children's Hospital                      | Boston, MA                                      |                                                                |                                                                                                   |
| Tor-Samuel-Aleer                                                         | Leek              |                              |                         | Boston Children's Hospital                      | Boston, MA                                      |                                                                |                                                                                                   |
| Gwendolyn                                                                | Orav              |                              |                         | Boston Children's Hospital                      | Boston, MA                                      |                                                                |                                                                                                   |
| Tonia                                                                    | Morrison          |                              |                         | Children's Hospital of Philadelphia             | Philadelphia, PA                                |                                                                |                                                                                                   |

\*First name, last name, and suffix (if applicable) are required and will appear in PubMed.

| *First Name and Middle Initial(s) | *Last Name    | *Suffix (eg, Jr, III) | Academic Degrees | Institution                                     | Location (city, state/province, country) | Role or Contribution, eg, chair, principal investigator | Group (if more than 1 Group listed in the byline) and/or Subgroup (eg, Steering Committee) |
|-----------------------------------|---------------|-----------------------|------------------|-------------------------------------------------|------------------------------------------|---------------------------------------------------------|--------------------------------------------------------------------------------------------|
| Katherine                         | Lupton        |                       |                  | Children's Hospital of Philadelphia             | Philadelphia, PA                         |                                                         |                                                                                            |
| Donna                             | Sylvester     |                       |                  | Children's Hospital of Philadelphia             | Philadelphia, PA                         |                                                         |                                                                                            |
| Dana                              | Albizem       |                       |                  | Children's Hospital of Philadelphia             | Philadelphia, PA                         |                                                         |                                                                                            |
| Kristin                           | Lanzilotta    |                       |                  | Children's Hospital of Philadelphia             | Philadelphia, PA                         |                                                         |                                                                                            |
| Grace                             | Marks         |                       |                  | Children's Hospital of Philadelphia             | Philadelphia, PA                         |                                                         |                                                                                            |
| Madison                           | Johnson       |                       |                  | Medical University of South Carolina            | Charleston, SC                           |                                                         |                                                                                            |
| Megan                             | Bickford      |                       |                  | Medical University of South Carolina            | Charleston, SC                           |                                                         |                                                                                            |
| Linda                             | Lambert       |                       |                  | Primary Children's Hospital                     | Salt Lake City, UT                       |                                                         |                                                                                            |
| Lilly                             | Fagatele      |                       |                  | Primary Children's Hospital                     | Salt Lake City, UT                       |                                                         |                                                                                            |
| Andrea                            | Curless       |                       |                  | Primary Children's Hospital                     | Salt Lake City, UT                       |                                                         |                                                                                            |
| Mark                              | Russell       |                       |                  | University of Michigan Health System            | Ann Arbor, MI                            | Primary investigator                                    |                                                                                            |
| Tammy                             | Doman         |                       |                  | University of Michigan Health System            | Ann Arbor, MI                            |                                                         |                                                                                            |
| Marisa                            | Almaguer      |                       |                  | Cincinnati Children's Hospital Medical Center   | Cincinnati, OH                           |                                                         |                                                                                            |
| Lauryn                            | Dugan         |                       |                  | Cincinnati Children's Hospital Medical Center   | Cincinnati, OH                           |                                                         |                                                                                            |
| Kathleen                          | Rathge        |                       |                  | Cincinnati Children's Hospital Medical Center   | Cincinnati, OH                           |                                                         |                                                                                            |
| Elizabeth                         | Seibert       |                       |                  | Cincinnati Children's Hospital Medical Center   | Cincinnati, OH                           |                                                         |                                                                                            |
| Mary                              | Stumpf        |                       |                  | Riley Children's Hospital                       | Indianapolis, IN                         |                                                         |                                                                                            |
| Jennifer                          | Howell        |                       |                  | Riley Children's Hospital                       | Indianapolis, IN                         |                                                         |                                                                                            |
| Jyoti                             | Patel         |                       |                  | Riley Children's Hospital                       | Indianapolis, IN                         |                                                         |                                                                                            |
| Gloria                            | Mitscher      |                       |                  | Riley Children's Hospital                       | Indianapolis, IN                         |                                                         |                                                                                            |
| Melissa                           | Burnett       |                       |                  | Children's Healthcare of Atlanta                | Atlanta, GA                              |                                                         |                                                                                            |
| Kolby                             | Sanders-Lewis |                       |                  | Children's Healthcare of Atlanta                | Atlanta, GA                              |                                                         |                                                                                            |
| Brooke                            | Evans         |                       |                  | Children's Healthcare of Atlanta                | Atlanta, GA                              |                                                         |                                                                                            |
| William T.                        | Mahle         |                       |                  | Children's Healthcare of Atlanta                | Atlanta, GA                              |                                                         |                                                                                            |
| Lazaros                           | Kochilas      |                       |                  | Children's Healthcare of Atlanta                | Atlanta, GA                              |                                                         |                                                                                            |
| Madison                           | Rudow         |                       |                  | Children's Healthcare of Atlanta                | Atlanta, GA                              |                                                         |                                                                                            |
| Susie                             | Gentry        |                       |                  | Children's Healthcare of Atlanta                | Atlanta, GA                              |                                                         |                                                                                            |
| Kristie                           | Le            |                       |                  | Children's Healthcare of Atlanta                | Atlanta, GA                              |                                                         |                                                                                            |
| Caitlen                           | Taylor        |                       |                  | Children's Healthcare of Atlanta                | Atlanta, GA                              |                                                         |                                                                                            |
| Lara                              | Shekerdeman   |                       |                  | Texas Children's Hospital                       | Houston, TX                              | Primary investigator                                    |                                                                                            |
| Elias                             | Moussi        |                       |                  | Texas Children's Hospital                       | Houston, TX                              |                                                         |                                                                                            |
| Sandra                            | Pena          |                       |                  | Texas Children's Hospital                       | Houston, TX                              |                                                         |                                                                                            |
| Ricardo                           | Pignatelli    |                       |                  | Texas Children's Hospital                       | Houston, TX                              |                                                         |                                                                                            |
| Olukayode                         | Garuba        |                       |                  | Texas Children's Hospital                       | Houston, TX                              |                                                         |                                                                                            |
| Asela                             | Liu           |                       |                  | Texas Children's Hospital                       | Houston, TX                              |                                                         |                                                                                            |
| Brett                             | Anderson      |                       |                  | Morgan Stanley Children's Hospital              | New York, NY                             | Primary investigator                                    |                                                                                            |
| Chantal                           | Sanchez       |                       |                  | Morgan Stanley Children's Hospital              | New York, NY                             |                                                         |                                                                                            |
| Karen                             | Martyrosyan   |                       |                  | Morgan Stanley Children's Hospital              | New York, NY                             |                                                         |                                                                                            |
| Jacqueline R.                     | Szmuszkovicz  |                       |                  | Children's Hospital Los Angeles                 | Los Angeles, CA                          | Primary investigator                                    |                                                                                            |
| Andrew L.                         | Cheng         |                       |                  | Children's Hospital Los Angeles                 | Los Angeles, CA                          |                                                         |                                                                                            |
| Sindhu                            | Mohandas      |                       |                  | Children's Hospital Los Angeles                 | Los Angeles, CA                          |                                                         |                                                                                            |
| Jodie K.                          | Votava-Smith  |                       |                  | Children's Hospital Los Angeles                 | Los Angeles, CA                          |                                                         |                                                                                            |
| Shuo                              | Wang          |                       |                  | Children's Hospital Los Angeles                 | Los Angeles, CA                          |                                                         |                                                                                            |
| Pierre C.                         | Wong          |                       |                  | Children's Hospital Los Angeles                 | Los Angeles, CA                          |                                                         |                                                                                            |
| Kavita                            | Sharma        |                       |                  | University of Texas Southwestern Medical Center | Dallas, TX                               | Primary investigator                                    |                                                                                            |
| Maria                             | Martinez      |                       |                  | University of Texas Southwestern Medical Center | Dallas, TX                               |                                                         |                                                                                            |
| Parvin                            | Mohazabnia    |                       |                  | University of Texas Southwestern Medical Center | Dallas, TX                               |                                                         |                                                                                            |
| Wendy                             | Rojas         |                       |                  | University of Texas Southwestern Medical Center | Dallas, TX                               |                                                         |                                                                                            |

## Supplemental Online Content: Nonauthor Collaborators

\*First name, last name, and suffix (if applicable) are required and will appear in PubMed.

| *First Name and Middle Initial(s) | *Last Name | *Suffix (eg, Jr, III) | Academic Degrees | Institution                                        | Location (city, state/province, country) | Role or Contribution, eg, chair, principal investigator | Group (if more than 1 Group listed in the byline) and/or Subgroup (eg, Steering Committee) |
|-----------------------------------|------------|-----------------------|------------------|----------------------------------------------------|------------------------------------------|---------------------------------------------------------|--------------------------------------------------------------------------------------------|
| Joseph                            | Block      |                       |                  | Children's Wisconsin, Medical College of Wisconsin | Milwaukee, WI                            | Primary investigator                                    |                                                                                            |
| Regina                            | Cole       |                       |                  | Children's Wisconsin, Medical College of Wisconsin | Milwaukee, WI                            |                                                         |                                                                                            |
| Jennifer                          | Maldonado  |                       |                  | Children's Wisconsin, Medical College of Wisconsin | Milwaukee, WI                            |                                                         |                                                                                            |
| Shubhika                          | Srivastava |                       |                  | Nemours Children's Hospital                        | Wilmington, DE                           | Primary investigator                                    |                                                                                            |
| Carol                             | Prospero   |                       |                  | Nemours Children's Hospital                        | Wilmington, DE                           |                                                         |                                                                                            |
| Varsha                            | Zadokar    |                       |                  | Nemours Children's Hospital                        | Wilmington, DE                           |                                                         |                                                                                            |
| Ed                                | Williams   |                       |                  | Nemours Children's Hospital                        | Wilmington, DE                           |                                                         |                                                                                            |
| Michael                           | Carr       |                       |                  | Ann & Robert Lurie Children's Hospital             | Chicago, IL                              | Primary investigator                                    |                                                                                            |
| Kathleen                          | Van't Hof  |                       |                  | Ann & Robert Lurie Children's Hospital             | Chicago, IL                              |                                                         |                                                                                            |
| Colleen                           | Sullivan   |                       |                  | Ann & Robert Lurie Children's Hospital             | Chicago, IL                              |                                                         |                                                                                            |
| Michael A.                        | Portman    |                       |                  | Seattle Children's Hospital                        | Seattle, WA                              | Primary investigator                                    |                                                                                            |
| Hidemi                            | Kajimoto   |                       |                  | Seattle Children's Hospital                        | Seattle, WA                              |                                                         |                                                                                            |
| Deepthi G.                        | Nair       |                       |                  | Seattle Children's Hospital                        | Seattle, WA                              |                                                         |                                                                                            |
| Mikayla A.                        | Beckley    |                       |                  | Seattle Children's Hospital                        | Seattle, WA                              |                                                         |                                                                                            |
| Joan                              | Pancheri   |                       |                  | Rady Children's Hospital                           | San Diego, CA                            |                                                         |                                                                                            |
| Katheryn                          | Crane      |                       |                  | Rady Children's Hospital                           | San Diego, CA                            |                                                         |                                                                                            |
| Ashraf                            | Harahsheh  |                       |                  | Children's National Hospital                       | Washington, DC                           | Co-investigator                                         |                                                                                            |
| Charles                           | Berul      |                       |                  | Children's National Hospital                       | Washington, DC                           | Co-investigator                                         |                                                                                            |
| Laura                             | Olivieri   |                       |                  | Children's National Hospital                       | Washington, DC                           | Co-investigator                                         |                                                                                            |
| Mitchell                          | Haverty    |                       |                  | Children's National Hospital                       | Washington, DC                           |                                                         |                                                                                            |
| Alix                              | Fetch      |                       |                  | Children's National Hospital                       | Washington, DC                           |                                                         |                                                                                            |
| Christina                         | Schott     |                       |                  | Children's National Hospital                       | Washington, DC                           |                                                         |                                                                                            |
| Sarah                             | Litt       |                       |                  | Children's National Hospital                       | Washington, DC                           |                                                         |                                                                                            |
| Jennifer                          | Nelson     |                       |                  | Children's Mercy Hospital                          | Kansas City, MO                          |                                                         |                                                                                            |
| Michelle                          | Hite       |                       |                  | Children's Hospital Colorado                       | Aurora, CA                               |                                                         |                                                                                            |
| Isabel                            | Glassmeyer |                       |                  | Children's Hospital Colorado                       | Aurora, CA                               |                                                         |                                                                                            |
| Todd                              | Nowlen     |                       |                  | Phoenix Children's Hospital                        | Phoenix, AZ                              | Co-investigator                                         |                                                                                            |
| Ashley                            | Herzberg   |                       |                  | Phoenix Children's Hospital                        | Phoenix, AZ                              |                                                         |                                                                                            |
| Samantha                          | Stack      |                       |                  | Phoenix Children's Hospital                        | Phoenix, AZ                              |                                                         |                                                                                            |
| Jade                              | Porche     |                       |                  | Phoenix Children's Hospital                        | Phoenix, AZ                              |                                                         |                                                                                            |
| Susan                             | Park       |                       |                  | Phoenix Children's Hospital                        | Phoenix, AZ                              |                                                         |                                                                                            |
| Amy                               | Johnson    |                       |                  | Phoenix Children's Hospital                        | Phoenix, AZ                              |                                                         |                                                                                            |
| Divya                             | Shakti     |                       |                  | University of Mississippi                          | Jackson, MS                              | Primary investigator                                    |                                                                                            |
| Aimee S.                          | Parnell    |                       |                  | University of Mississippi                          | Jackson, MS                              |                                                         |                                                                                            |
| Michael D.                        | Weiland    |                       |                  | University of Mississippi                          | Jackson, MS                              |                                                         |                                                                                            |
| Phenique                          | Parker     |                       |                  | University of Mississippi                          | Jackson, MS                              |                                                         |                                                                                            |
| Jeffrey A.                        | Kertis     |                       |                  | University of Mississippi                          | Jackson, MS                              |                                                         |                                                                                            |
| Charlotte V.                      | Hobbs      |                       |                  | University of Mississippi                          | Jackson, MS                              |                                                         |                                                                                            |
| Candace M.                        | Howard     |                       |                  | University of Mississippi                          | Jackson, MS                              |                                                         |                                                                                            |
| Shivraj                           | Savadkar   |                       |                  | University of Mississippi                          | Jackson, MS                              |                                                         |                                                                                            |
| Aren E.                           | Worrell    |                       |                  | University of Mississippi                          | Jackson, MS                              |                                                         |                                                                                            |
| Madelyn R.                        | Barr       |                       |                  | University of Mississippi                          | Jackson, MS                              |                                                         |                                                                                            |
| Heather                           | Williams   |                       |                  | University of Mississippi                          | Jackson, MS                              |                                                         |                                                                                            |
| David                             | Gordy      |                       |                  | University of Mississippi                          | Jackson, MS                              |                                                         |                                                                                            |
| Preeti                            | Vemula     |                       |                  | University of Mississippi                          | Jackson, MS                              |                                                         |                                                                                            |
| Zachary                           | White      |                       |                  | University of Mississippi                          | Jackson, MS                              |                                                         |                                                                                            |
| Jemyll Grace S.                   | Morato     |                       |                  | University of Mississippi                          | Jackson, MS                              |                                                         |                                                                                            |
| Sandra                            | Tyler      |                       |                  | University of Mississippi                          | Jackson, MS                              |                                                         |                                                                                            |

## Supplemental Online Content: Nonauthor Collaborators

\*First name, last name, and suffix (if applicable) are required and will appear in PubMed.

| *First Name and Middle Initial(s) | *Last Name    | *Suffix (eg, Jr, III) | Academic Degrees | Institution                               | Location (city, state/province, country) | Role or Contribution, eg, chair, principal investigator | Group (if more than 1 Group listed in the byline) and/or Subgroup (eg, Steering Committee) |
|-----------------------------------|---------------|-----------------------|------------------|-------------------------------------------|------------------------------------------|---------------------------------------------------------|--------------------------------------------------------------------------------------------|
| Krissie                           | Hock          |                       |                  | University of Alabama                     | Birmingham, AL                           |                                                         |                                                                                            |
| Michelle                          | Sykes         |                       |                  | Valley Children's Healthcare and Hospital | Madera, CA                               | Primary investigator                                    |                                                                                            |
| Carl                              | Owada         |                       |                  | Valley Children's Healthcare and Hospital | Madera, CA                               |                                                         |                                                                                            |
| Mayra                             | Lemus Rangel  |                       |                  | Valley Children's Healthcare and Hospital | Madera, CA                               |                                                         |                                                                                            |
| Isaura                            | Macias        |                       |                  | Valley Children's Healthcare and Hospital | Madera, CA                               |                                                         |                                                                                            |
| Gautham                           | Singh         |                       |                  | Children's Hospital of Michigan           | Detroit, MI                              | Primary investigator                                    |                                                                                            |
| Sanjeev                           | Aggarwal      |                       |                  | Children's Hospital of Michigan           | Detroit, MI                              | Primary investigator                                    |                                                                                            |
| Charmaine                         | Williams-Farr |                       |                  | Children's Hospital of Michigan           | Detroit, MI                              |                                                         |                                                                                            |
| Nancy                             | Sullivan      |                       |                  | Children's Hospital of Michigan           | Detroit, MI                              |                                                         |                                                                                            |
| Aiman                             | Almasnaah     |                       |                  | Children's Hospital of Michigan           | Detroit, MI                              |                                                         |                                                                                            |
| Vishnu                            | Undyala       |                       |                  | Children's Hospital of Michigan           | Detroit, MI                              |                                                         |                                                                                            |
| Brian                             | Hannah        |                       |                  | Children's Hospital of Michigan           | Detroit, MI                              |                                                         |                                                                                            |
| Mary                              | McCall        |                       |                  | Children's Hospital of Michigan           | Detroit, MI                              |                                                         |                                                                                            |
| Jacob                             | Strelow       |                       |                  | Dell Medical Center                       | Austin, TX                               |                                                         |                                                                                            |
| Rachel                            | Downey        |                       |                  | Dell Medical Center                       | Austin, TX                               |                                                         |                                                                                            |
| Ken                               | Shaffer       |                       |                  | Dell Medical Center                       | Austin, TX                               |                                                         |                                                                                            |
| Chesney                           | Castleberry   |                       |                  | Dell Medical Center                       | Austin, TX                               |                                                         |                                                                                            |
| Lisa                              | Pomeroy       |                       |                  | Dell Medical Center                       | Austin, TX                               |                                                         |                                                                                            |
| Rachel                            | Amsellem      |                       |                  | Dell Medical Center                       | Austin, TX                               |                                                         |                                                                                            |
| Olga                              | Shamailova    |                       |                  | Cohen Children's Hospital                 | New Hyde Park, NY                        |                                                         |                                                                                            |
| Marla                             | Johnston      |                       |                  | Children's Hospital New Orleans           | New Orleans, LA                          |                                                         |                                                                                            |
| Juan Carlos                       | Muniz         |                       |                  | Nicklaus Children's                       | Miami, FL                                | Primary investigator                                    |                                                                                            |
| Moya                              | Chang         |                       |                  | Nicklaus Children's                       | Miami, FL                                |                                                         |                                                                                            |
| Ryan                              | Shea          |                       |                  | University of North Carolina              | Chapel Hill, NC                          | Primary investigator                                    |                                                                                            |
| Miriam                            | Davis         |                       |                  | University of North Carolina              | Chapel Hill, NC                          |                                                         |                                                                                            |
| Maryanne                          | Chrisant      |                       |                  | DiMaggio Children's Hospital              | Hollywood, FL                            | Primary investigator                                    |                                                                                            |
| Danielle                          | Katz          |                       |                  | DiMaggio Children's Hospital              | Hollywood, FL                            |                                                         |                                                                                            |
| Norma                             | Barton        |                       |                  | DiMaggio Children's Hospital              | Hollywood, FL                            |                                                         |                                                                                            |
| Doris                             | Alaby         |                       |                  | DiMaggio Children's Hospital              | Hollywood, FL                            |                                                         |                                                                                            |
| Paulette                          | Smith         |                       |                  | DiMaggio Children's Hospital              | Hollywood, FL                            |                                                         |                                                                                            |
| Kevin                             | Friedman      |                       |                  |                                           |                                          | Echocardiography Core Laboratory                        |                                                                                            |
| Francesca                         | Sperotto      |                       |                  |                                           |                                          | Echocardiography Core Laboratory                        |                                                                                            |
| Ed                                | Marcus        |                       |                  |                                           |                                          | Echocardiography Core Laboratory                        |                                                                                            |
| Raquel                            | Ferreira      |                       |                  |                                           |                                          | Echocardiography Core Laboratory                        |                                                                                            |
| Patrick                           | McGeoghegan   |                       |                  |                                           |                                          | Echocardiography Core Laboratory                        |                                                                                            |
| Michael                           | Taylor        |                       |                  |                                           |                                          | MRI Core Laboratory                                     |                                                                                            |
| Joshua                            | Germann       |                       |                  |                                           |                                          | MRI Core Laboratory                                     |                                                                                            |
| Andrew                            | Powell        |                       |                  |                                           |                                          | MRI Core Laboratory                                     |                                                                                            |
| Andrew                            | Mackie        |                       |                  |                                           |                                          | Acting Chair, Protocol Review Committee                 |                                                                                            |
| Jogarao                           | Gobburu       |                       |                  |                                           |                                          | Protocol Review Committee                               |                                                                                            |
| Sally                             | Hunsberger    |                       |                  |                                           |                                          | Protocol Review Committee                               |                                                                                            |
| Patrick                           | McQuillen     |                       |                  |                                           |                                          | Protocol Review Committee                               |                                                                                            |
| Michael                           | Spaeder       |                       |                  |                                           |                                          | Protocol Review Committee                               |                                                                                            |
| Dianne                            | Atkins        |                       |                  |                                           |                                          | Data and Safety Monitoring Board                        |                                                                                            |
| Craig                             | Broberg       |                       |                  |                                           |                                          | Data and Safety Monitoring Board                        |                                                                                            |
| David J.                          | Driscoll      |                       |                  |                                           |                                          | Data and Safety Monitoring Board                        |                                                                                            |
| Frank                             | Evans         |                       |                  |                                           |                                          | Data and Safety Monitoring Board Executive Secretary    |                                                                                            |
| Sally A.                          | Hunsberger    |                       |                  |                                           |                                          | Data and Safety Monitoring Board                        |                                                                                            |

Supplemental Online Content: Nonauthor Collaborators

\*First name, last name, and suffix (if applicable) are required and will appear in PubMed.

| *First Name and Middle Initial(s) | *Last Name | *Suffix (eg, Jr, III) | Academic Degrees | Institution | Location (city, state/province, country) | Role or Contribution, eg, chair, principal investigator | Group (if more than 1 Group listed in the byline) and/or Subgroup (eg, Steering Committee) |
|-----------------------------------|------------|-----------------------|------------------|-------------|------------------------------------------|---------------------------------------------------------|--------------------------------------------------------------------------------------------|
| Liza-Marie                        | Johnson    |                       |                  |             |                                          | Data and Safety Monitoring Board                        |                                                                                            |
| Thomas J.                         | Knight     |                       |                  |             |                                          | Data and Safety Monitoring Board                        |                                                                                            |
| Paul                              | Lipkin     |                       |                  |             |                                          | Data and Safety Monitoring Board                        |                                                                                            |
| J. Philip                         | Saul       |                       |                  |             |                                          | Data and Safety Monitoring Board Chair                  |                                                                                            |
