# Supplementary material for: Examination of Adverse Reactions After COVID-19 Vaccination Among Patients With a History of Multisystem Inflammatory Syndrome in Children
Source: PubMed Central journal article supplement (PMC9857632; doi:10.1001/jamanetworkopen.2022.48987), 2023-01-03
Supplement: jamanetwopen-e2248987-s003.pdf [file jamanetwopen-e2248987-s003.pdf]

## Data Sharing Statement

Elias. Examination of Adverse Reactions After COVID-19 Vaccination Among Patients With a History of Multisystem Inflammatory Syndrome in Children. *JAMA Netw Open*. Published January 03, 2023. doi:10.1001/jamanetworkopen.2022.48987

### Data

**Data available:** No
